# Supplementary material for: Development of non-enzymatic glucose electrode based on Au nanoparticles decorated single-walled carbon nanohorns
Source: Research Square preprint supplement (doi:10.21203/rs.3.rs-198395/v1), 2021-02-10
Supplement: Supplementary file 1 [file 74fa8c65a1a829e461c8dc07.docx]

**Supplementary Materials**

**Development of non-enzymatic glucose electrode based on Au nanoparticles decorated single-walled carbon nanohorns**

Hong-Wei Lv, Hui-Ling Peng *, Quan-Fu Li *

College of Electronic Engineering, Guangxi Normal University. Guilin541004. China

*E-mail: [penghuiling1008@163.com](mailto:penghuiling1008@163.com) (Hui-Ling Peng), [lear-super@163.com](mailto:lear-super@163.com) (Quan-Fu Li)


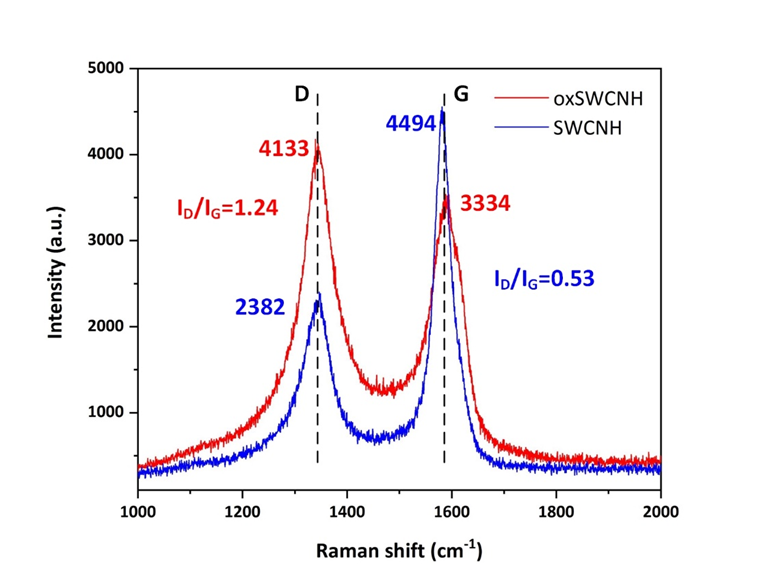


Fig.S1 Raman spectra of oxSWCNHs (red) and SWCNHs (blue). (ID/IG: intensity ratio of D and G peaks)


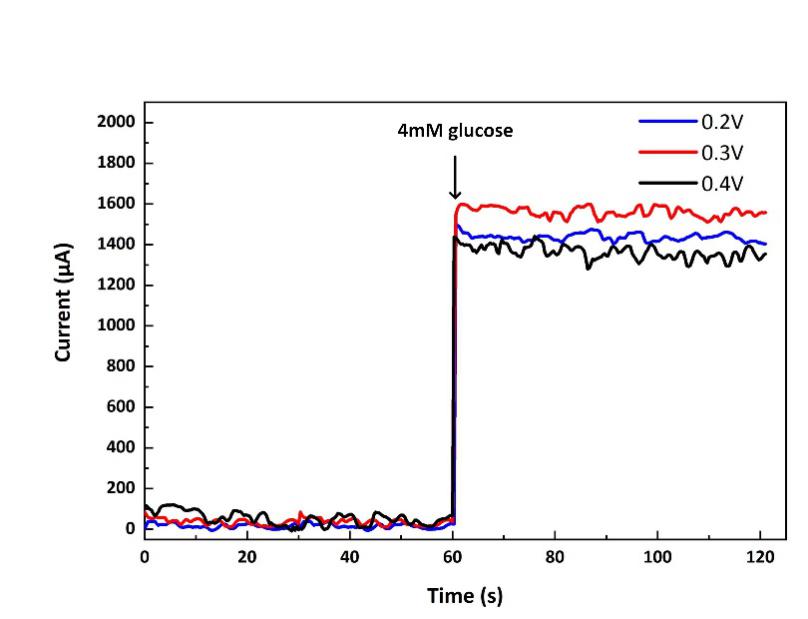


Fig.S2 Amperometric response at 0.2, 0.3, and 0.4 V (vs. Ag/AgCl) of the Au-SWCNHs/Au electrode in a 4 mM glucose solution.


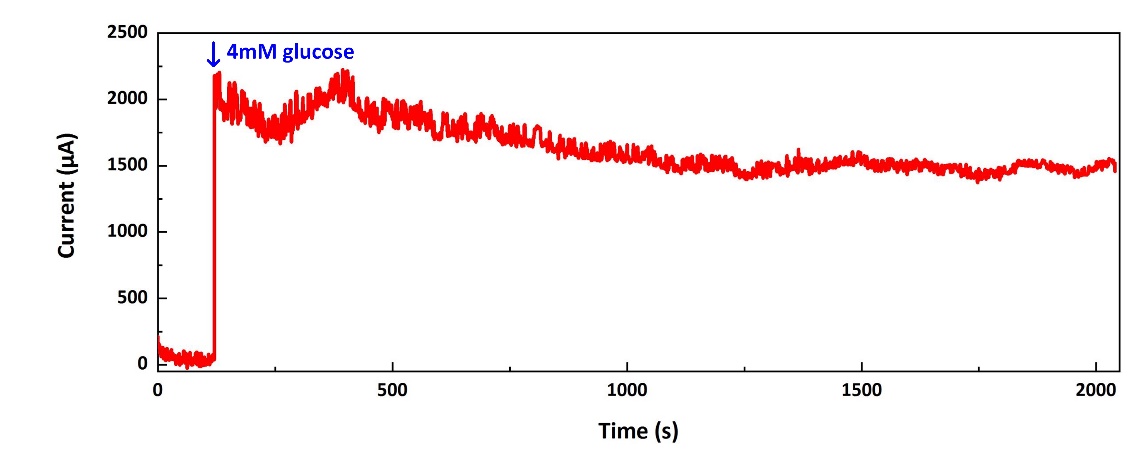


Fig.S3 Amperometric response of the Au-SWCNHs/Au electrode to 4 mM glucose over a large period of time (2000 s).


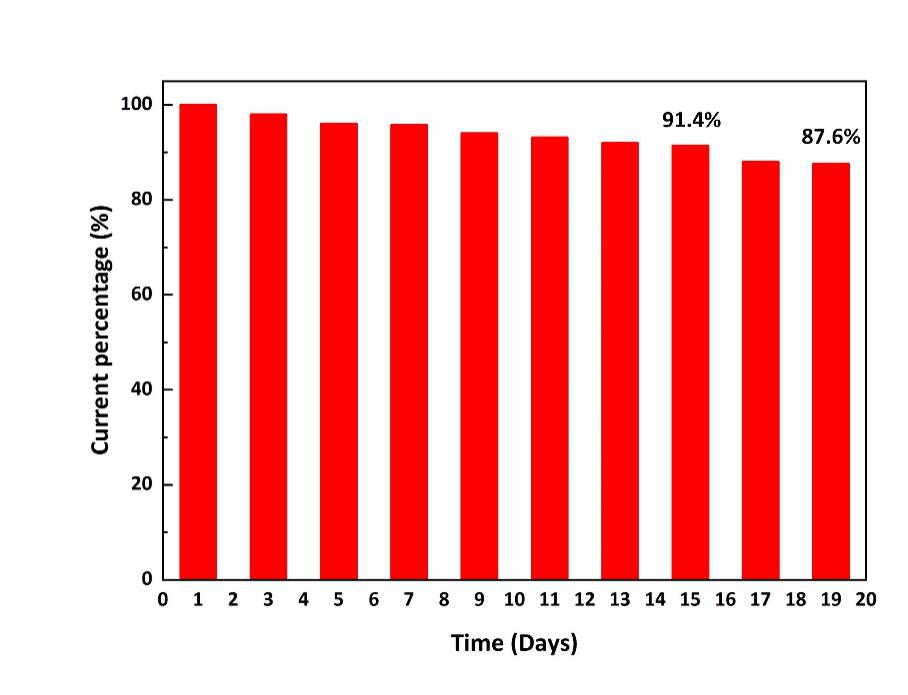


Fig. S4 Stability of the Au-SWCNHs/Au electrode stored in air tight container for 19 days.
